# Supplementary material for: Efficiently luminescent copper(i) iodide complexes with crystallization-induced emission enhancement (CIEE)
Source: Royal Society of Chemistry journal article supplement (doi:10.1039/c9dt01910c), 2019-01-01
Supplement: c9dt01910c1.pdf [file c9dt01910c1.pdf]

Electronic Supplementary Information (ESI)

## Efficient luminescent copper(I) iodide complexes with crystallization-induced emission enhancement (CIEE) caused by $\pi$ - $\pi$ interaction

Mingxue Yang,<sup>a,c</sup> Xu-Lin Chen<sup>\*b</sup> and Can-Zhong Lu<sup>\*a,b</sup>

a. State Key Laboratory of Structural Chemistry, Fujian Institute of Research on the Structure of Matter, Chinese Academy of Sciences, Fuzhou, Fujian, 350002, China.

b. Xiamen Institute of Rare-earth Materials, Haixi Institute, Chinese Academy of Sciences, Xiamen, Fujian, 361021, China.

c. University of Chinese Academy of Sciences, Beijing, 100049, China.

E-mail: czlu@fjirsm.ac.cn; xlchem@fjirsm.ac.cn

### Contents

|                                                 |    |
|-------------------------------------------------|----|
| Synthesis & Characteristics.....                | 1  |
| a) Characteristic Instruments and methods.....  | 1  |
| b) Synthesis.....                               | 2  |
| Synthetic Strategy.....                         | 4  |
| Powder X-ray Diffraction.....                   | 5  |
| Thermodynamics Analysis.....                    | 10 |
| Scanning Electron Microscope (SEM) pattern..... | 11 |
| X-ray photoelectron spectroscopy (XPS).....     | 12 |
| Theoretical Calculation.....                    | 13 |
| Crystallographic Data.....                      | 16 |
| References of ESI.....                          | 24 |

## Synthesis & Characteristics

All the starting chemicals are purchased from reagent manufacturers and are chemical pure without further purification unless specified.

### a) Characteristic Instruments and methods

- Nuclear Magnetic Resonance (NMR)

<sup>1</sup>H NMR was performed by Bruker Avance III 400MHz NMR Spectroscopy.

- Crystallography

Crystallography data were obtained from Rigaku SuperNova, with CCD detector and X-ray source of Cu K<sub>α</sub> (λ=1.54184Å). Crystal resolution were carried out by Olex2 program (ver.1.2.10) equipping ShelXL-2016 package.<sup>1-3</sup>

- Powder X-ray diffraction (PXRD)

PXRD was performed on Rigaku MiniFlex-600. The sample holder was a silicon wafer with a small indentation in the center.

- Thermodynamics Analysis

Thermogravimetry - Differential Scanning Calorimeter (TG-DSC) diagram was performed by Mettler-Toledo TGA/DSC 1 STARe. The experiment was taken under nitrogen atmosphere. Alumina crucibles were used and the heating rate was 10°C / min.

- Photoluminescence properties

Photoluminescent properties were measured by Horiba Jobin-Yvon FluoroMax-4 fluorescence spectrometer.

The lifetime of each sample was characterized by Edinburgh Instruments FLS980 UV/V/NIR Fluorescence Spectrometer. 375 nm laser was served as the light source.

- Calculation

Density Function Theory (DFT) and Time-dependent DFT (TD-DFT), with B3LYP/6-31(d) level, was adopted and calculations were performed by Gaussian 09 program (version D.01)<sup>4</sup>. Composition analysis and Natural Transition Orbitals (NTO) analysis were carried out by MultiWfn<sup>5</sup>. Frontier orbitals were depicted by VMD<sup>6</sup>. Crystal structure data were utilized without further optimization.

## b) Synthesis

1. N Ligand (2-methyl-6-(1H-pyrazol-1-yl)pyridine) was synthesized by a previously reported method.<sup>7</sup>

2. Complex **1** was synthesized as follows:

In a 20 mL serum bottle add 10 mL of dichloromethane, 0.035 g (0.22 mmol) of N ligand, after stirring for 5 minutes, 0.019 g of CuI (0.10 mmol) was added into the solution. CuI gradually disappeared, followed by the precipitation of yellow solid. After 10 minutes' agitating, the mixture was filtered and washed by acetonitrile and hexane. The yellow powder was collected after dryness. Product was 0.028 g. (yield: 80.1%) <sup>1</sup>H NMR (400 MHz, DMSO-*d*<sub>6</sub>) δ 8.92 (s, 1H), 8.05 (t, *J* = 7.8 Hz, 2H), 7.97 (s, 1H), 7.41 (s, 1H), 6.80 (s, 1H), 2.62 (s, 3H). Element Analysis: C 30.86; H 2.61; N 11.98 (Calc: C, 30.92; H, 2.59; N, 12.02)

The **contact method** for cultivating crystalline complex **1** is as follows:

Into a 20 mL of serum bottle the DCM solution of N ligand, buffer layer that consists of DCM and CH<sub>3</sub>CN in volumetric ratio of 1:1, and acetonitrile solution of CuI were carefully flowed down the wall, respectively. The volume of each part was 5 mL and the amount of the two solute counterparts were equal. Make sure the boundary of each layer be observed.

3. Complex **2** was synthesized as follows:

In a 20 mL serum bottle add 10 mL of dichloromethane, 0.032 g (0.20 mmol) of N ligand and 0.027 g (0.10 mmol) of PPh<sub>3</sub>, after stirring for 5 minutes, 0.019 g of CuI (0.10 mmol) was added into the solution. CuI gradually disappeared, and transparent yellow solution was formed. After 10 minutes' agitating, the mixture was filtered, evaporated under reduced pressure and washed by hexane. The pale yellow powder was collected after dryness. Product was 0.030 g. (yield: 49.0%) <sup>1</sup>H NMR (400 MHz, Chloroform-*d*) δ 8.53 (s, 1H), 7.78 (t, *J* = 7.9 Hz, 1H), 7.70 (d, *J* = 1.6 Hz, 1H), 7.64 (d, *J* = 8.2 Hz, 1H), 7.50 (t, *J* = 8.8 Hz, 6H), 7.36 (t, *J* = 7.3 Hz, 3H), 7.28 (t, *J* = 7.3 Hz, 6H), 7.10 (d, *J* = 7.5 Hz, 1H), 6.50 (dd, *J* = 2.7, 1.7 Hz, 1H), 2.70 (s, 3H). Element Analysis: C 53.08; H 3.98; N 7.01. (Calc: C, 53.00; H, 3.95; N, 6.87)

4. Complex **3** was synthesized as follows:

In a 20 mL serum bottle add 10 mL of acetonitrile, 0.019 g of CuI (0.10 mmol) was added into the liquid. The mixture was treated by ultra-sonication for 5 minutes so as to completely dissolve CuI. After that, 0.027 g (0.10 mmol) of PPh<sub>3</sub> was added into the solution. Stir for 5 minutes and then stop. A few

Electronic Supplementary Information (ESI)

moments later, the single crystal complex **3** precipitated. <sup>1</sup>H NMR (400 MHz, DMSO-*d*<sub>6</sub>) δ 7.44 (dt, *J* = 12.4, 3.8 Hz). Product was 0.040 g. (yield: 88.3%)  
Element Analysis: C 47.80; H 3.41.(Calc: C, 47.75; H, 3.34)

## Synthetic Strategy

Table S1 Selected conditions and results of the control test

| Sequence                               | Solvent            | Volume | CuI:N <sup>a</sup> :PPh | Crystal  |
|----------------------------------------|--------------------|--------|-------------------------|----------|
|                                        | <b>t</b>           |        | <b>3</b>                | <b>b</b> |
| N <sup>a</sup> N <sup>→</sup> PPh<br>3 | DCM <sup>c</sup>   | 10 mL  | 1:1:1                   | <b>3</b> |
| PPh <sub>3</sub> →N <sup>a</sup><br>N  | DCM                | 10 mL  | 1:1:1                   | <b>3</b> |
| N <sup>a</sup> N <sup>→</sup> PPh<br>3 | CH <sub>3</sub> CN | 10 mL  | 1:1:1                   | <b>3</b> |
| N <sup>a</sup> N <sup>→</sup> PPh<br>3 |                    | 5 mL   |                         | <b>3</b> |
|                                        | DCM                | 15 mL  | 1:1:1                   | <b>3</b> |
|                                        |                    | 20 mL  |                         | <b>3</b> |
| N <sup>a</sup> N <sup>→</sup> PPh<br>3 |                    |        | 1:4:1                   | <b>1</b> |
|                                        |                    |        | 1:3:1                   | <b>2</b> |
|                                        |                    |        | 1:2:1                   | <b>2</b> |
|                                        | DCM                | 10 mL  | 1:1:2                   | <b>3</b> |
|                                        |                    |        | 1:1:3                   | <b>3</b> |
|                                        |                    |        | 1:1:4                   | <b>3</b> |

a. N<sup>a</sup>N refers to N ligand. b. Crystals that firstly and mainly come out. c. Dichloromethane.

### Powder X-ray Diffraction

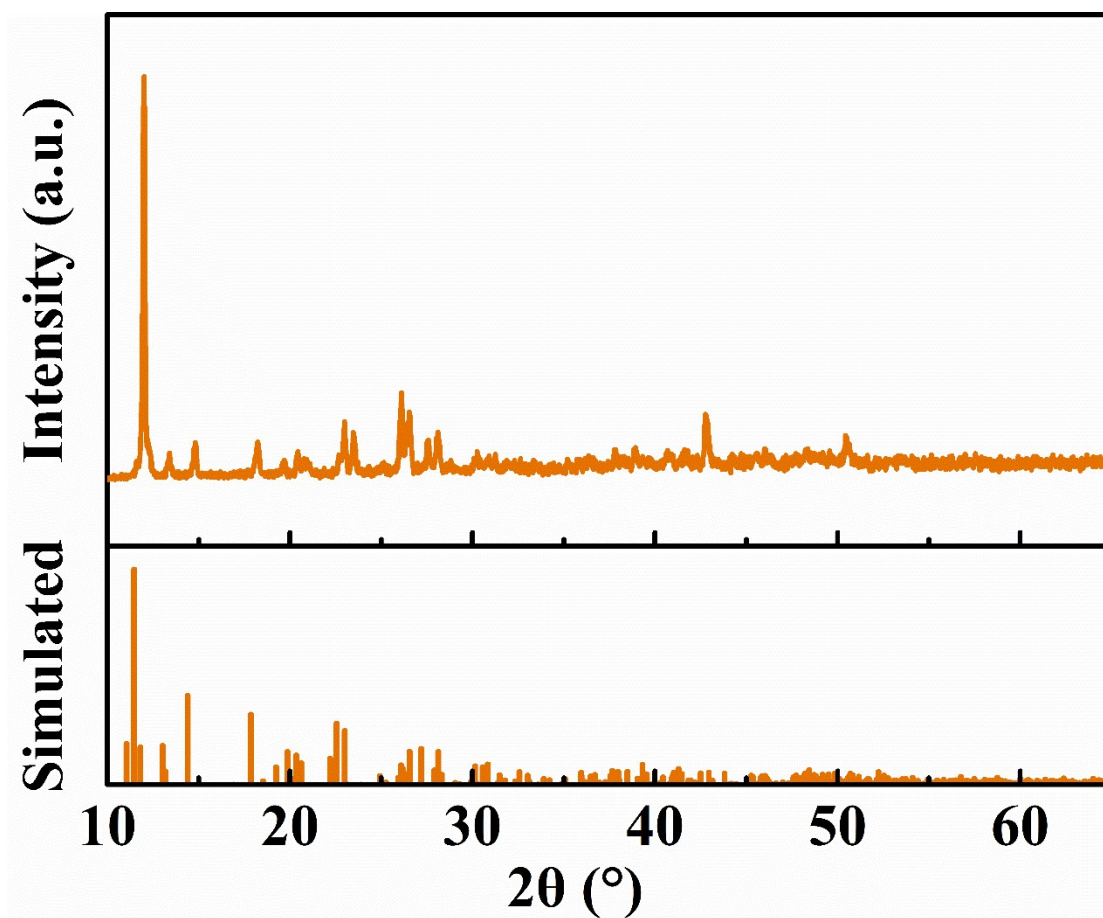

Fig. S1 Powder X-ray diffraction of complex 1. A simulated pattern was shown under the pattern of the crystallized sample.

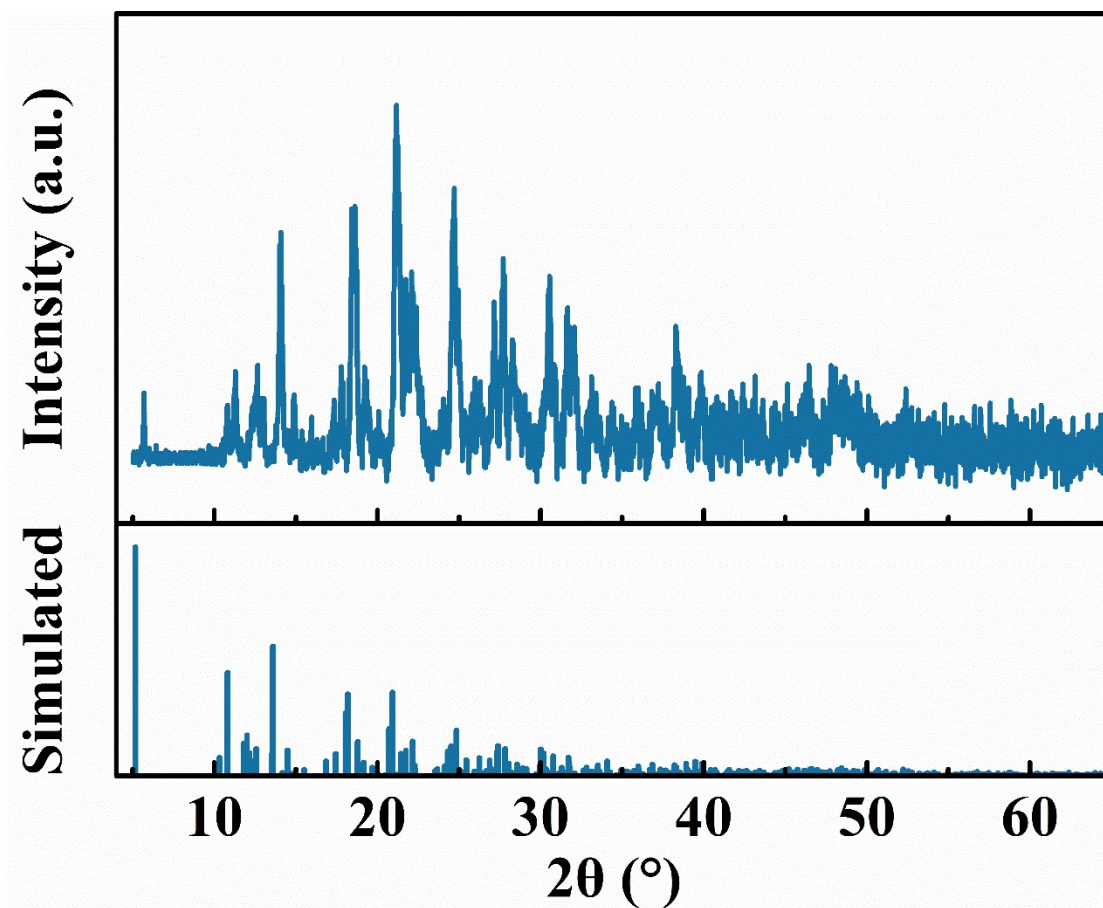

Fig. S2 Powder X-ray diffraction of complex 2. A simulated pattern was shown under the pattern of the crystallized sample.

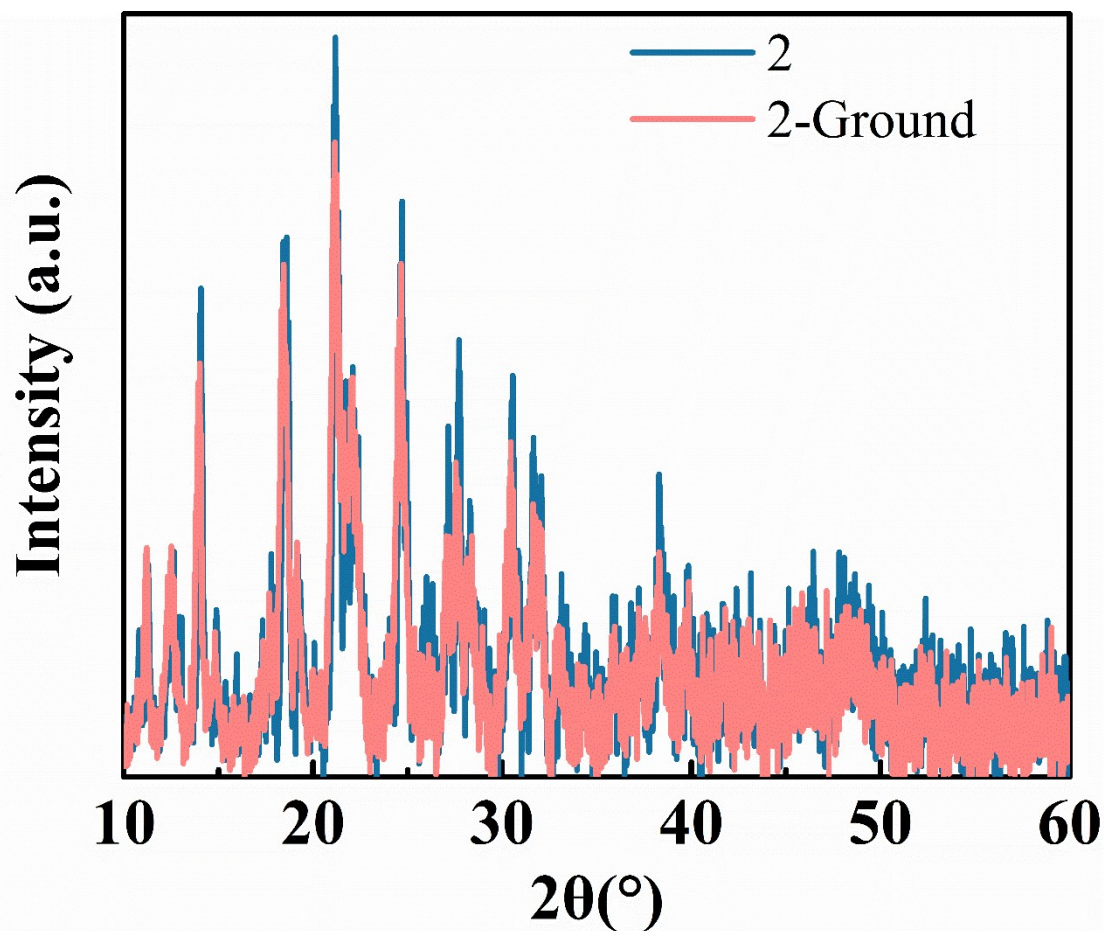

Fig. S3 A comparison between as-synthesized and ground complex 2.



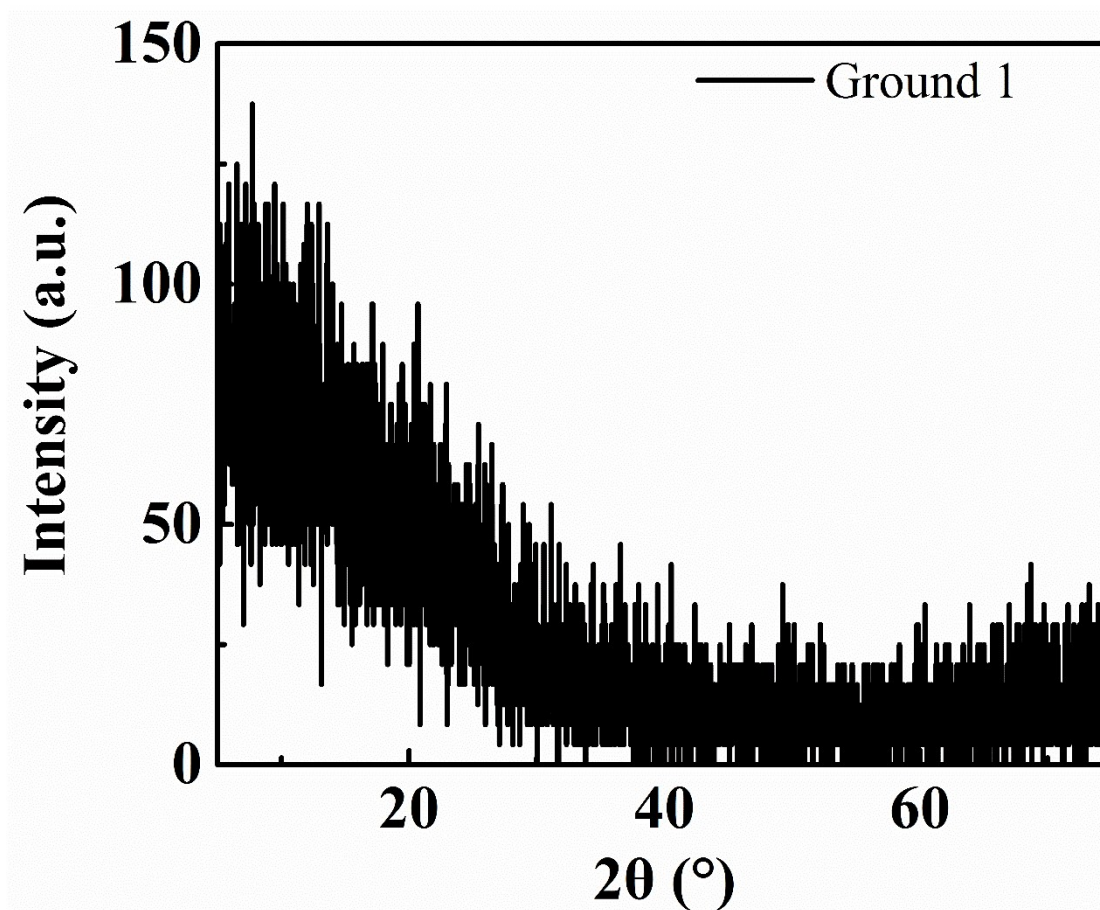

Fig. S4 Powder X-ray diffraction pattern of ground complex 1.

**Method of recovering complex 1:**

Since the insolubility for most of the solvents of complex **1**, recovery of complex **1** was performed by stirring the ground powder in DCM for 10 minutes. The suspension gradually turned brighter under the UV-light. The mixture was then filtered, dried at 50 °C in an oven and cooled down to room temperature before the tests in the following cycles.

## Thermodynamics Analysis

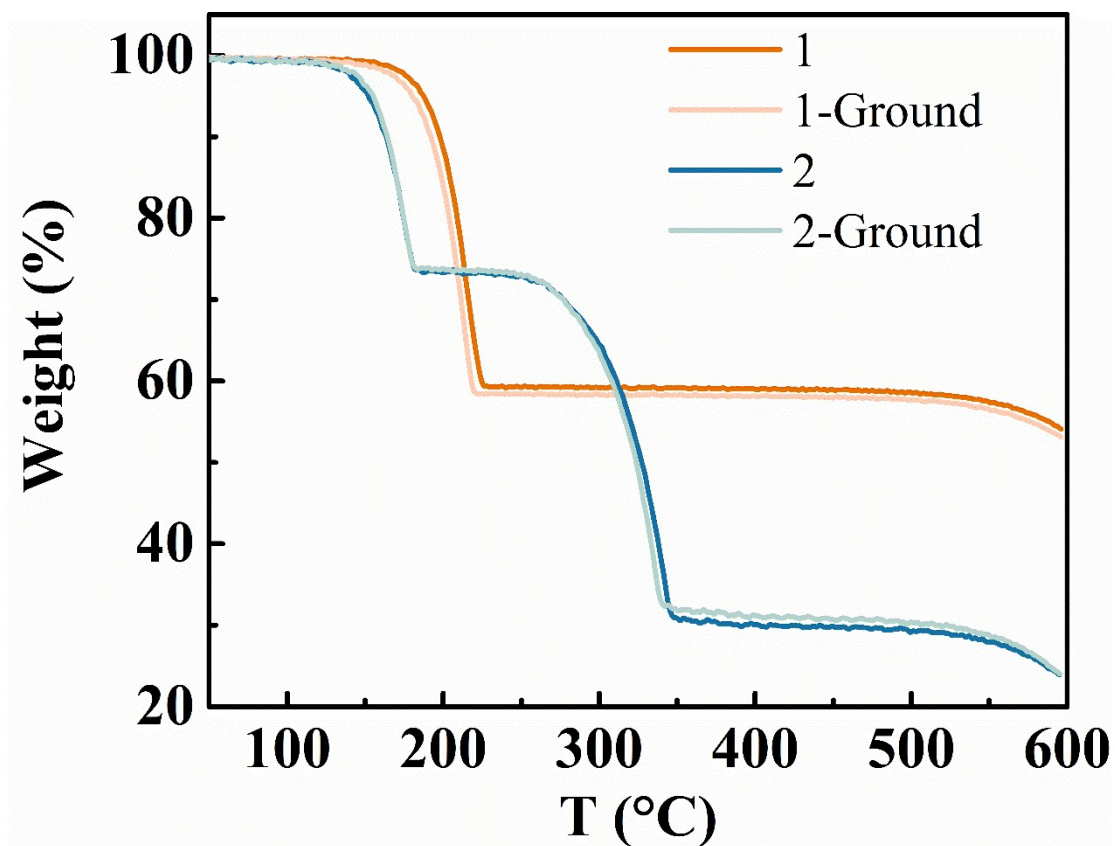

Fig. S5 Thermogravimetric analysis (TGA) curves for complex **1** and **2**, and their corresponding ground samples. Little changes existed between each sample and respective ground one. For complex **1** and **1-ground**, the weight loss at around 230 K should be attributed to the decomposition of N ligand, which is also the process occurred in the first staircase of complex **2** and **2-ground**. The second weight loss for complex **2** and **2-ground** is the loss of PPh<sub>3</sub> ligand.

## Scanning Electron Microscope (SEM) pattern

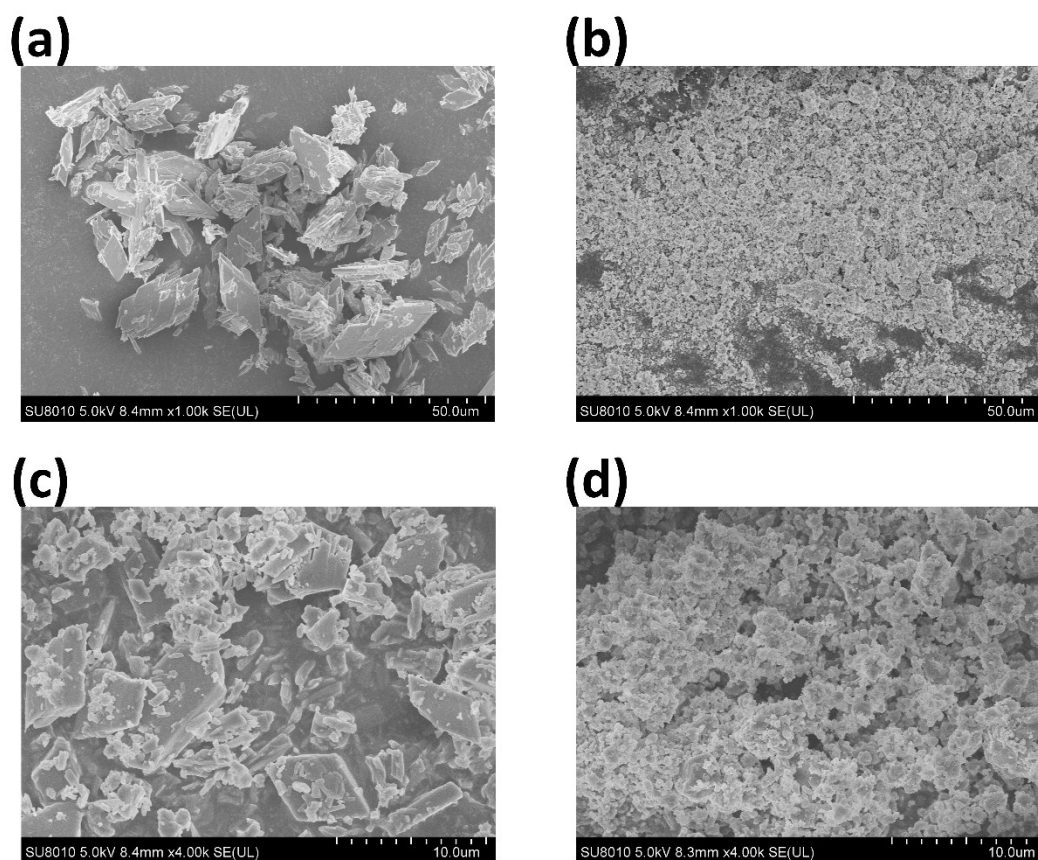

Fig S6 SEM patterns of (a) crystalline **1**, (b) ground **1**, (c) crystalline **2** and (d) ground **2**. It is obvious that (a) and (c) were in good shapes, (b) was totally amorphous and (d) was the mixture of crystalline and amorphous sample.

## X-ray photoelectron spectroscopy (XPS)

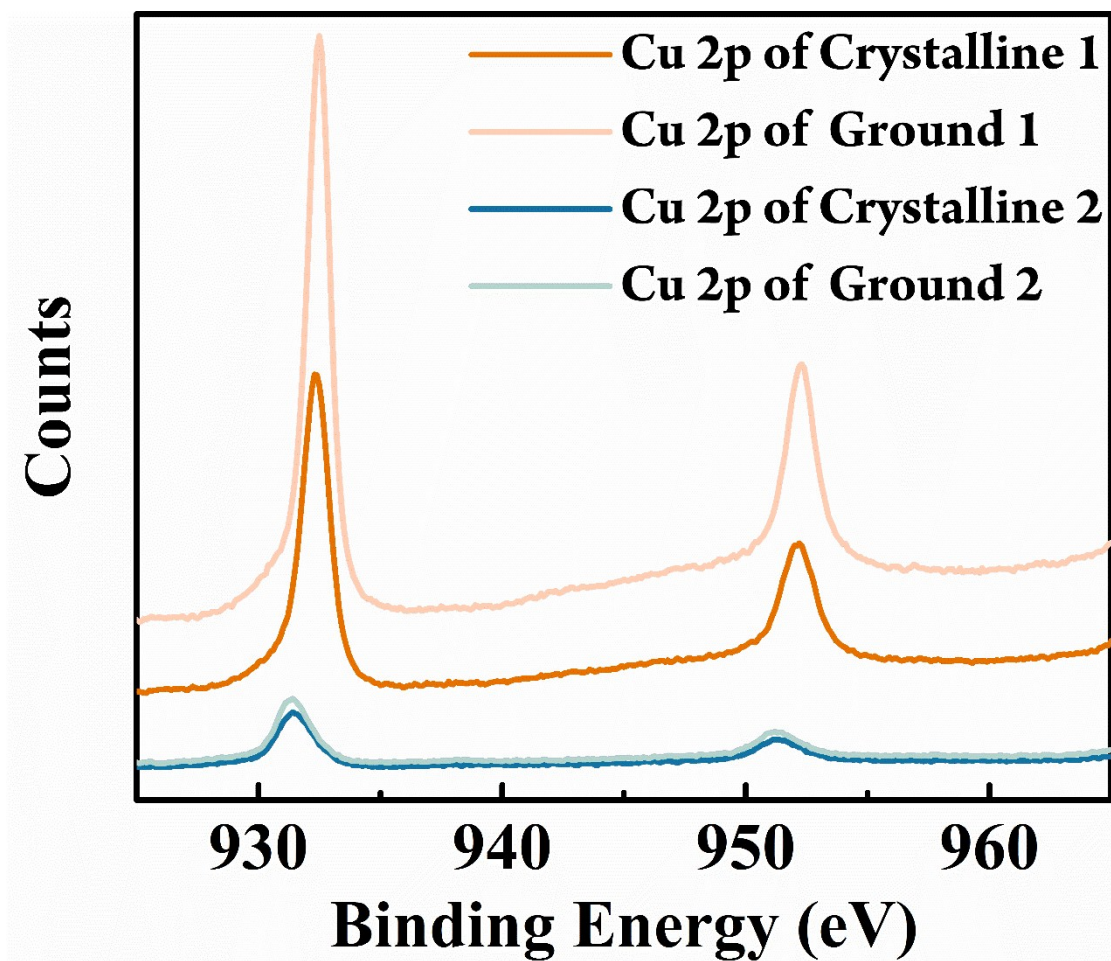

Fig. S7 XPS spectra for Cu 2p orbital of crystalline and ground 1 and 2. According to the data (<https://xpssimplified.com/elements/copper.php>), no strong  $\text{Cu}^{2+}$  satellite peaks were found in all the spectra, indicating that Cu(I) in each sample remained unchanged before and after grinding.

## Theoretical Calculation

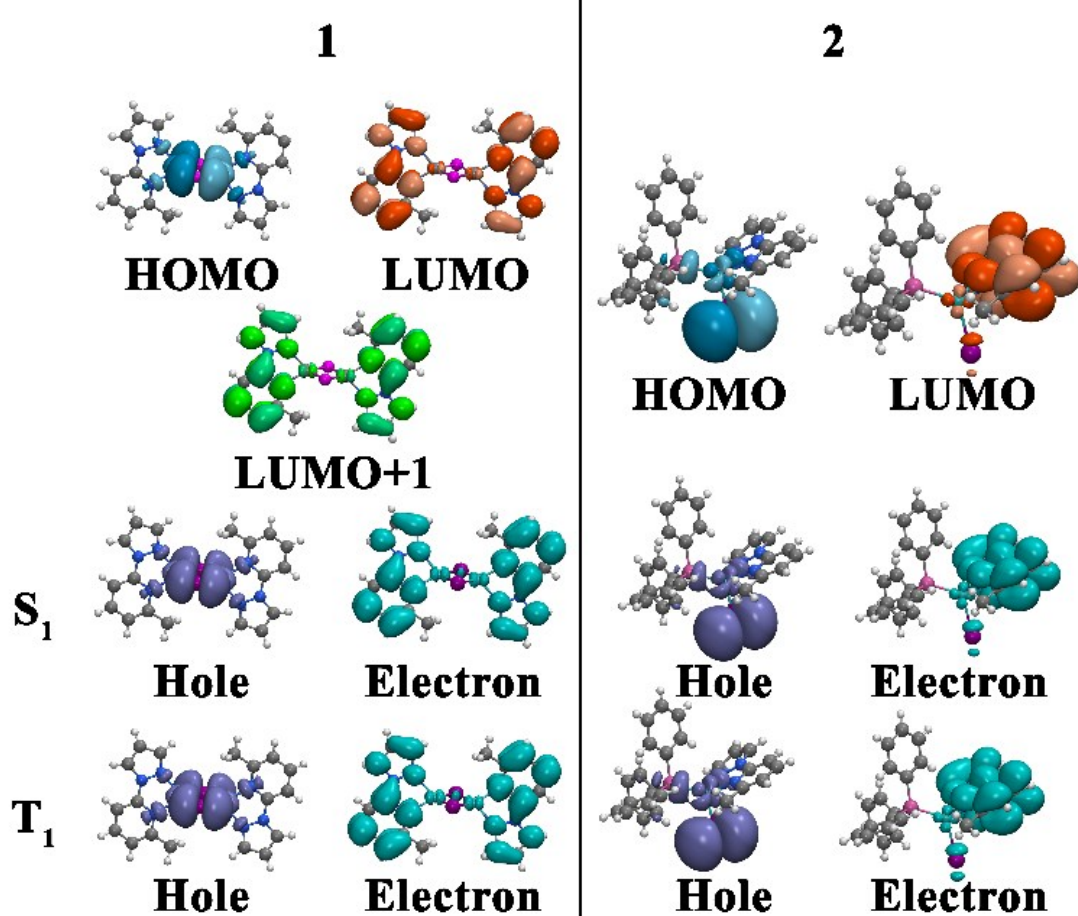

Fig. S7 Molecular orbitals of complex **1** and **2**. Highest occupied molecular orbitals (HOMO), lowest unoccupied molecular orbitals (LUMO), and the molecular orbital related to the lowest excited state transitions was drawn. Hole and electron distributions of complex **1** and **2** were also depicted using natural transition orbitals (NTO).

Table S2 Component analysis of orbitals participating in the lowest excited transitions ( $S_1$  and  $T_1$ ).

| Component              | 1      |        | 2      |        |
|------------------------|--------|--------|--------|--------|
|                        | HOMO   | LUMO+1 | HOMO   | LUMO   |
| <b>Cu</b>              | 58.02% | 3.29%  | 15.07% | 3.65%  |
| <b>I</b>               | 34.56% | 2.59%  | 73.60% | 1.50%  |
| <b>N ligand</b>        | 7.42%  | 94.12% | 2.94%  | 92.23% |
| <b>PPh<sub>3</sub></b> |        |        | 8.39%  | 2.61%  |

Electronic Supplementary Information (ESI)

Table S3 Component analysis of natural transition orbitals (NTOs) and characterization of the charge transfer properties.

|          |             | Cu     | I      | N ligand | PPh3  |
|----------|-------------|--------|--------|----------|-------|
| <b>1</b> | Hole        | 60.22% | 31.74% | 8.04%    |       |
|          | S1 Electron | 4.09%  | 3.16%  | 92.75%   |       |
|          | Difference* | 56.13% | 28.58% | -84.71%  |       |
|          | Hole        | 60.60% | 32.08% | 7.33%    |       |
|          | T1 Electron | 3.91%  | 3.03%  | 93.06%   |       |
|          | Difference  | 56.69% | 29.04% | -85.73%  |       |
| <b>2</b> | Hole        | 21.04% | 65.55% | 3.85%    | 9.56% |
|          | S1 Electron | 4.59%  | 2.02%  | 90.39%   | 2.99% |
|          | Difference  | 16.44% | 63.53% | -86.54%  | 6.56% |
|          | Hole        | 17.90% | 70.76% | 3.71%    | 7.63% |
|          | T1 Electron | 3.96%  | 1.76%  | 91.59%   | 2.69% |
|          | Difference  | 13.95% | 68.99% | -87.88%  | 4.94% |

\* Difference = Hole - Electron, in which positive indicates hole-rich part whereas negative electron-rich part.



## Crystallographic Data

Table S4 Crystal data and structure refinement for complex 1

|                                             |                                                                               |
|---------------------------------------------|-------------------------------------------------------------------------------|
| Identification code                         | 1897169_CuINN                                                                 |
| Empirical formula                           | C <sub>18</sub> H <sub>18</sub> Cu <sub>2</sub> I <sub>2</sub> N <sub>6</sub> |
| Formula weight                              | 699.26                                                                        |
| Temperature/K                               | 100.01(13)                                                                    |
| Crystal system                              | triclinic                                                                     |
| Space group                                 | P-1                                                                           |
| a/Å                                         | 7.5443(3)                                                                     |
| b/Å                                         | 8.7471(5)                                                                     |
| c/Å                                         | 9.5306(5)                                                                     |
| α/°                                         | 111.300(5)                                                                    |
| β/°                                         | 109.905(4)                                                                    |
| γ/°                                         | 99.247(4)                                                                     |
| Volume/Å <sup>3</sup>                       | 521.13(5)                                                                     |
| Z                                           | 1                                                                             |
| ρ <sub>calc</sub> /cm <sup>3</sup>          | 2.228                                                                         |
| μ/mm <sup>-1</sup>                          | 25.907                                                                        |
| F(000)                                      | 332.0                                                                         |
| Crystal size/mm <sup>3</sup>                | 0.1 × 0.08 × 0.05                                                             |
| Radiation                                   | CuKα (λ = 1.54184)                                                            |
| 2θ range for data collection/°              | 11.058 to 138.488                                                             |
| Index ranges                                | -9 ≤ h ≤ 6, -10 ≤ k ≤ 10, -9 ≤ l ≤ 11                                         |
| Reflections collected                       | 5238                                                                          |
| Independent reflections                     | 1927 [R <sub>int</sub> = 0.0621, R <sub>sigma</sub> = 0.0517]                 |
| Data/restraints/parameters                  | 1927/0/128                                                                    |
| Goodness-of-fit on F <sup>2</sup>           | 1.096                                                                         |
| Final R indexes [I ≥ 2σ (I)]                | R <sub>1</sub> = 0.0363, wR <sub>2</sub> = 0.0943                             |
| Final R indexes [all data]                  | R <sub>1</sub> = 0.0381, wR <sub>2</sub> = 0.0962                             |
| Largest diff. peak/hole / e Å <sup>-3</sup> | 1.98/-0.99                                                                    |

**Table S5 Bond lengths for complex 1**

| Atom  | Atom   | Length/Å   | Atom | Atom | Length/Å |
|-------|--------|------------|------|------|----------|
| I(1)  | Cu(1)  | 2.5934(8)  | N(3) | C(8) | 1.358(7) |
| I(1)  | Cu(1)* | 2.6086(8)  | N(1) | C(1) | 1.318(7) |
| Cu(1) | Cu(1)* | 2.5595(14) | C(1) | C(2) | 1.407(7) |
| Cu(1) | N(3)   | 2.107(4)   | C(2) | C(3) | 1.369(8) |
| Cu(1) | N(1)   | 2.066(4)   | C(4) | C(5) | 1.390(7) |
| N(2)  | N(1)   | 1.359(6)   | C(5) | C(6) | 1.377(8) |
| N(2)  | C(3)   | 1.357(6)   | C(6) | C(7) | 1.383(8) |
| N(2)  | C(4)   | 1.419(7)   | C(7) | C(8) | 1.380(7) |
| N(3)  | C(4)   | 1.341(6)   | C(8) | C(9) | 1.498(7) |

\*1-X, 1-Y, -Z

**Table S6 Bond angles for complex 1**

| Atom   | Atom  | Atom   | Angle/°    | Atom | Atom | Atom  | Angle/°  |
|--------|-------|--------|------------|------|------|-------|----------|
| Cu(1)  | I(1)  | Cu(1)* | 58.95(3)   | C(8) | N(3) | Cu(1) | 127.5(3) |
| I(1)   | Cu(1) | I(1)*  | 121.05(3)  | N(2) | N(1) | Cu(1) | 113.1(3) |
| Cu(1)* | Cu(1) | I(1)*  | 60.23(3)   | C(1) | N(1) | Cu(1) | 141.8(4) |
| Cu(1)* | Cu(1) | I(1)   | 60.82(3)   | C(1) | N(1) | N(2)  | 105.1(4) |
| N(3)   | Cu(1) | I(1)   | 117.13(12) | N(1) | C(1) | C(2)  | 111.6(5) |
| N(3)   | Cu(1) | I(1)*  | 109.07(12) | C(3) | C(2) | C(1)  | 104.9(5) |
| N(3)   | Cu(1) | Cu(1)* | 142.66(13) | N(2) | C(3) | C(2)  | 106.9(4) |
| N(1)   | Cu(1) | I(1)*  | 113.58(12) | N(3) | C(4) | N(2)  | 114.6(4) |
| N(1)   | Cu(1) | I(1)   | 110.03(12) | N(3) | C(4) | C(5)  | 124.1(5) |
| N(1)   | Cu(1) | Cu(1)* | 139.00(13) | C(5) | C(4) | N(2)  | 121.3(5) |
| N(1)   | Cu(1) | N(3)   | 78.25(17)  | C(6) | C(5) | C(4)  | 117.0(5) |
| N(1)   | N(2)  | C(4)   | 118.9(4)   | C(5) | C(6) | C(7)  | 120.3(5) |
| C(3)   | N(2)  | N(1)   | 111.5(4)   | C(8) | C(7) | C(6)  | 119.2(5) |
| C(3)   | N(2)  | C(4)   | 129.1(4)   | N(3) | C(8) | C(7)  | 121.7(5) |
| C(4)   | N(3)  | Cu(1)  | 114.8(3)   | N(3) | C(8) | C(9)  | 115.3(4) |
| C(4)   | N(3)  | C(8)   | 117.7(4)   | C(7) | C(8) | C(9)  | 122.9(5) |

\*1-X, 1-Y, -Z

**Table S7 Crystal data and structure refinement for complex 2**

|                                                   |                                                               |
|---------------------------------------------------|---------------------------------------------------------------|
| <b>Identification code</b>                        | 1897143_CuINP                                                 |
| <b>Empirical formula</b>                          | C <sub>27</sub> H <sub>24</sub> CuIN <sub>3</sub> P           |
| <b>Formula weight</b>                             | 611.90                                                        |
| <b>Temperature/K</b>                              | 99.97(15)                                                     |
| <b>Crystal system</b>                             | triclinic                                                     |
| <b>Space group</b>                                | P-1                                                           |
| <b>a/Å</b>                                        | 8.1926(3)                                                     |
| <b>b/Å</b>                                        | 9.4737(5)                                                     |
| <b>c/Å</b>                                        | 17.6793(9)                                                    |
| <b>α/°</b>                                        | 78.611(4)                                                     |
| <b>β/°</b>                                        | 77.753(4)                                                     |
| <b>γ/°</b>                                        | 67.501(4)                                                     |
| <b>Volume/Å<sup>3</sup></b>                       | 1228.55(11)                                                   |
| <b>Z</b>                                          | 2                                                             |
| <b>ρ<sub>calc</sub>/g/cm<sup>3</sup></b>          | 1.654                                                         |
| <b>μ/mm<sup>-1</sup></b>                          | 11.886                                                        |
| <b>F(000)</b>                                     | 608.0                                                         |
| <b>Crystal size/mm<sup>3</sup></b>                | 0.1 × 0.08 × 0.07                                             |
| <b>Radiation</b>                                  | CuKα (λ = 1.54184)                                            |
| <b>2θ range for data collection/°</b>             | 10.192 to 138.842                                             |
| <b>Index ranges</b>                               | -9 ≤ h ≤ 9, -11 ≤ k ≤ 11, -20 ≤ l ≤ 21                        |
| <b>Reflections collected</b>                      | 13015                                                         |
| <b>Independent reflections</b>                    | 4542 [R <sub>int</sub> = 0.0357, R <sub>sigma</sub> = 0.0305] |
| <b>Data/restraints/parameters</b>                 | 4542/0/299                                                    |
| <b>Goodness-of-fit on F<sup>2</sup></b>           | 1.050                                                         |
| <b>Final R indexes [I&gt;=2σ (I)]</b>             | R <sub>1</sub> = 0.0278, wR <sub>2</sub> = 0.0717             |
| <b>Final R indexes [all data]</b>                 | R <sub>1</sub> = 0.0285, wR <sub>2</sub> = 0.0720             |
| <b>Largest diff. peak/hole / e Å<sup>-3</sup></b> | 1.00/-0.65                                                    |

**Table S8 Bond lengths for complex 2**

| <b>Atom</b> | <b>Atom</b> | <b>Length/Å</b> | <b>Atom</b> | <b>Atom</b> | <b>Length/Å</b> |
|-------------|-------------|-----------------|-------------|-------------|-----------------|
| I(1)        | Cu(1)       | 2.6243(4)       | C(8)        | C(9)        | 1.492(4)        |
| Cu(1)       | P(1)        | 2.2061(7)       | C(10)       | C(11)       | 1.395(4)        |
| Cu(1)       | N(1)        | 2.090(3)        | C(10)       | C(15)       | 1.395(4)        |
| Cu(1)       | N(3)        | 2.107(2)        | C(11)       | C(12)       | 1.389(4)        |
| P(1)        | C(10)       | 1.833(3)        | C(12)       | C(13)       | 1.390(4)        |
| P(1)        | C(16)       | 1.834(3)        | C(13)       | C(14)       | 1.380(4)        |
| P(1)        | C(22)       | 1.832(3)        | C(14)       | C(15)       | 1.395(4)        |
| N(1)        | N(2)        | 1.362(3)        | C(16)       | C(17)       | 1.393(4)        |
| N(1)        | C(1)        | 1.319(4)        | C(16)       | C(21)       | 1.395(4)        |
| N(2)        | C(3)        | 1.364(4)        | C(17)       | C(18)       | 1.396(4)        |
| N(2)        | C(4)        | 1.409(4)        | C(18)       | C(19)       | 1.383(4)        |
| N(3)        | C(4)        | 1.340(4)        | C(19)       | C(20)       | 1.387(4)        |
| N(3)        | C(8)        | 1.350(4)        | C(20)       | C(21)       | 1.390(4)        |
| C(1)        | C(2)        | 1.397(5)        | C(22)       | C(23)       | 1.394(4)        |
| C(2)        | C(3)        | 1.356(5)        | C(22)       | C(27)       | 1.395(4)        |
| C(4)        | C(5)        | 1.392(4)        | C(23)       | C(24)       | 1.388(4)        |
| C(5)        | C(6)        | 1.380(4)        | C(24)       | C(25)       | 1.381(4)        |
| C(6)        | C(7)        | 1.390(5)        | C(25)       | C(26)       | 1.373(4)        |
| C(7)        | C(8)        | 1.388(4)        | C(26)       | C(27)       | 1.399(4)        |

**Table S9 Bond angles for complex 2**

| Atom  | Atom  | Atom  | Angle/°    | Atom  | Atom  | Atom  | Angle/°  |
|-------|-------|-------|------------|-------|-------|-------|----------|
| P(1)  | Cu(1) | I(1)  | 119.99(2)  | C(8)  | C(7)  | C(6)  | 119.3(3) |
| N(1)  | Cu(1) | I(1)  | 105.30(7)  | N(3)  | C(8)  | C(7)  | 121.5(3) |
| N(1)  | Cu(1) | P(1)  | 110.29(7)  | N(3)  | C(8)  | C(9)  | 117.0(3) |
| N(1)  | Cu(1) | N(3)  | 78.29(10)  | C(7)  | C(8)  | C(9)  | 121.4(3) |
| N(3)  | Cu(1) | I(1)  | 103.02(7)  | C(11) | C(10) | P(1)  | 118.1(2) |
| N(3)  | Cu(1) | P(1)  | 130.13(7)  | C(15) | C(10) | P(1)  | 123.3(2) |
| C(10) | P(1)  | Cu(1) | 121.86(9)  | C(15) | C(10) | C(11) | 118.6(2) |
| C(10) | P(1)  | C(16) | 101.84(12) | C(12) | C(11) | C(10) | 120.9(3) |
| C(16) | P(1)  | Cu(1) | 110.76(8)  | C(11) | C(12) | C(13) | 119.8(3) |
| C(22) | P(1)  | Cu(1) | 114.43(9)  | C(14) | C(13) | C(12) | 120.0(3) |
| C(22) | P(1)  | C(10) | 102.48(12) | C(13) | C(14) | C(15) | 120.1(3) |
| C(22) | P(1)  | C(16) | 103.27(12) | C(14) | C(15) | C(10) | 120.5(3) |
| N(2)  | N(1)  | Cu(1) | 112.29(18) | C(17) | C(16) | P(1)  | 123.2(2) |
| C(1)  | N(1)  | Cu(1) | 142.0(2)   | C(17) | C(16) | C(21) | 119.0(2) |
| C(1)  | N(1)  | N(2)  | 105.1(2)   | C(21) | C(16) | P(1)  | 117.7(2) |
| N(1)  | N(2)  | C(3)  | 111.3(2)   | C(16) | C(17) | C(18) | 120.5(3) |
| N(1)  | N(2)  | C(4)  | 119.0(2)   | C(19) | C(18) | C(17) | 119.8(3) |
| C(3)  | N(2)  | C(4)  | 129.7(3)   | C(18) | C(19) | C(20) | 120.2(3) |
| C(4)  | N(3)  | Cu(1) | 114.58(19) | C(19) | C(20) | C(21) | 119.9(3) |
| C(4)  | N(3)  | C(8)  | 118.1(2)   | C(20) | C(21) | C(16) | 120.4(3) |
| C(8)  | N(3)  | Cu(1) | 127.0(2)   | C(23) | C(22) | P(1)  | 118.5(2) |
| N(1)  | C(1)  | C(2)  | 111.2(3)   | C(23) | C(22) | C(27) | 118.2(3) |
| C(3)  | C(2)  | C(1)  | 106.1(3)   | C(27) | C(22) | P(1)  | 123.3(2) |
| C(2)  | C(3)  | N(2)  | 106.4(3)   | C(24) | C(23) | C(22) | 121.0(3) |
| N(3)  | C(4)  | N(2)  | 115.4(2)   | C(25) | C(24) | C(23) | 120.1(3) |
| N(3)  | C(4)  | C(5)  | 124.1(3)   | C(26) | C(25) | C(24) | 119.9(3) |
| C(5)  | C(4)  | N(2)  | 120.6(3)   | C(25) | C(26) | C(27) | 120.4(3) |
| C(6)  | C(5)  | C(4)  | 117.2(3)   | C(22) | C(27) | C(26) | 120.4(3) |
| C(5)  | C(6)  | C(7)  | 119.8(3)   |       |       |       |          |

**Table S10 Crystal data and structure refinement for complex 3**

|                                                         |                                                   |
|---------------------------------------------------------|---------------------------------------------------|
| <b>Identification code</b>                              | CuIP                                              |
| <b>Empirical formula</b>                                | $C_{72}H_{60}Cu_4I_4P_4 \cdot 1.2 CH_3CN$         |
| <b>Formula weight</b>                                   | 1860.17                                           |
| <b>Temperature/K</b>                                    | 100.00(18)                                        |
| <b>Crystal system</b>                                   | monoclinic                                        |
| <b>Space group</b>                                      | C2/c                                              |
| <b>a/Å</b>                                              | 25.9779(15)                                       |
| <b>b/Å</b>                                              | 16.0832(5)                                        |
| <b>c/Å</b>                                              | 18.0362(7)                                        |
| <b><math>\alpha</math>/°</b>                            | 90                                                |
| <b><math>\beta</math>/°</b>                             | 109.224(4)                                        |
| <b><math>\gamma</math>/°</b>                            | 90                                                |
| <b>Volume/Å<sup>3</sup></b>                             | 7115.5(6)                                         |
| <b>Z</b>                                                | 4                                                 |
| <b><math>\rho_{calc}</math>/cm<sup>3</sup></b>          | 1.736                                             |
| <b><math>\mu</math>/mm<sup>-1</sup></b>                 | 16.142                                            |
| <b>F(000)</b>                                           | 3626.0                                            |
| <b>Crystal size/mm<sup>3</sup></b>                      | 0.153 × 0.095 × 0.048                             |
| <b>Radiation</b>                                        | CuK $\alpha$ ( $\lambda$ = 1.54184)               |
| <b>2<math>\theta</math> range for data collection/°</b> | 7.208 to 134.48                                   |
| <b>Index ranges</b>                                     | -31 ≤ h ≤ 31, -19 ≤ k ≤ 19, -21 ≤ l ≤ 19          |
| <b>Reflections collected</b>                            | 18262                                             |
| <b>Independent reflections</b>                          | 6303 [ $R_{int}$ = 0.0520, $R_{\sigma}$ = 0.0660] |
| <b>Data/restraints/parameters</b>                       | 6303/14/408                                       |
| <b>Goodness-of-fit on F<sup>2</sup></b>                 | 1.070                                             |
| <b>Final R indexes [<math>I \geq 2\sigma(I)</math>]</b> | $R_1$ = 0.0606, $wR_2$ = 0.1425                   |
| <b>Final R indexes [all data]</b>                       | $R_1$ = 0.0735, $wR_2$ = 0.1498                   |
| <b>Largest diff. peak/hole / e Å<sup>-3</sup></b>       | 3.13/-2.50                                        |

**Table S11 Bond lengths for complex 3**

| Atom | Atom  | Length/Å   | Atom | Atom | Length/Å  |
|------|-------|------------|------|------|-----------|
| I001 | Cu03* | 2.6969(13) | C00F | C00P | 1.364(13) |
| I001 | Cu03  | 2.6982(12) | C00G | C00R | 1.390(11) |
| I001 | Cu04  | 2.5894(13) | C00G | C00Z | 1.374(13) |
| I002 | Cu03  | 2.6452(13) | C00H | C00M | 1.399(13) |
| I002 | Cu04  | 2.5363(12) | C00I | C00Q | 1.374(12) |
| Cu03 | Cu04  | 2.7798(18) | C00J | C014 | 1.386(13) |
| Cu03 | P005  | 2.245(2)   | C00K | C00Y | 1.386(14) |
| Cu04 | P006  | 2.229(3)   | C00K | C015 | 1.374(14) |
| P005 | C008  | 1.823(8)   | C00L | C00N | 1.389(13) |
| P005 | C00A  | 1.823(8)   | C00M | C00S | 1.389(15) |
| P005 | C00B  | 1.836(9)   | C00N | C00W | 1.389(12) |
| P006 | C009  | 1.820(9)   | C00O | C011 | 1.390(13) |
| P006 | C00G  | 1.833(8)   | C00P | C00X | 1.368(13) |
| P006 | C00K  | 1.823(8)   | C00Q | C00T | 1.375(12) |
| C007 | C00B  | 1.383(11)  | C00R | C00V | 1.398(13) |
| C007 | C00F  | 1.408(12)  | C00S | C014 | 1.361(14) |
| C008 | C00I  | 1.388(11)  | C00T | C011 | 1.377(13) |
| C008 | C00O  | 1.387(12)  | C00U | C00V | 1.380(14) |
| C009 | C00H  | 1.393(12)  | C00U | C013 | 1.391(14) |
| C009 | C00J  | 1.382(13)  | C00Y | C010 | 1.387(14) |
| C00A | C00C  | 1.401(12)  | C00Z | C013 | 1.380(12) |
| C00A | C00W  | 1.409(11)  | C010 | C012 | 1.348(16) |
| C00B | C00D  | 1.386(13)  | C012 | C016 | 1.373(17) |
| C00C | C00E  | 1.389(12)  | C015 | C016 | 1.400(15) |
| C00D | C00X  | 1.407(12)  | C1   | N2   | 1.06(2)   |

\*3/2-X, 3/2-Y, 1-Z

**Table S12 Selected bond angles for complex 3**

| Atom  | Atom | Atom  | Angle/°   | Atom | Atom | Atom | Angle/°   |
|-------|------|-------|-----------|------|------|------|-----------|
| Cu03* | I001 | Cu03  | 78.64(4)  | C00W | C00A | P005 | 118.0(6)  |
| Cu04  | I001 | Cu03* | 105.42(4) | C007 | C00B | P005 | 122.0(7)  |
| Cu04  | I001 | Cu03  | 63.39(4)  | C007 | C00B | C00D | 120.2(8)  |
| Cu04  | I002 | Cu03  | 64.85(4)  | C00D | C00B | P005 | 117.8(6)  |
| I001* | Cu03 | I001  | 101.36(4) | C00E | C00C | C00A | 121.1(8)  |
| I001  | Cu03 | Cu04  | 56.39(4)  | C00B | C00D | C00X | 119.7(9)  |
| I001* | Cu03 | Cu04  | 116.04(5) | C00L | C00E | C00C | 120.3(8)  |
| I002  | Cu03 | I001  | 111.91(5) | C00P | C00F | C007 | 120.2(8)  |
| I002  | Cu03 | I001* | 103.14(4) | C00R | C00G | P006 | 123.1(7)  |
| I002  | Cu03 | Cu04  | 55.68(4)  | C00Z | C00G | P006 | 117.3(6)  |
| P005  | Cu03 | I001  | 113.02(6) | C00Z | C00G | C00R | 119.6(8)  |
| P005  | Cu03 | I001* | 114.40(7) | C009 | C00H | C00M | 121.5(9)  |
| P005  | Cu03 | I002  | 112.17(7) | C00Q | C00I | C008 | 121.9(8)  |
| P005  | Cu03 | Cu04  | 129.56(8) | C009 | C00J | C014 | 120.3(8)  |
| I001  | Cu04 | Cu03  | 60.21(4)  | C00Y | C00K | P006 | 118.3(7)  |
| I002  | Cu04 | I001  | 119.49(5) | C015 | C00K | P006 | 122.4(7)  |
| I002  | Cu04 | Cu03  | 59.47(4)  | C015 | C00K | C00Y | 119.2(9)  |
| P006  | Cu04 | I001  | 113.27(7) | C00E | C00L | C00N | 119.9(8)  |
| P006  | Cu04 | I002  | 126.30(7) | C00S | C00M | C00H | 118.7(9)  |
| P006  | Cu04 | Cu03  | 164.73(8) | C00W | C00N | C00L | 120.2(8)  |
| C008  | P005 | Cu03  | 114.0(3)  | C008 | C00O | C011 | 120.6(9)  |
| C008  | P005 | C00A  | 104.6(4)  | C00F | C00P | C00X | 121.0(8)  |
| C008  | P005 | C00B  | 102.6(4)  | C00I | C00Q | C00T | 119.5(8)  |
| C00A  | P005 | Cu03  | 114.3(3)  | C00G | C00R | C00V | 119.5(9)  |
| C00A  | P005 | C00B  | 104.9(4)  | C014 | C00S | C00M | 119.8(9)  |
| C00B  | P005 | Cu03  | 115.0(3)  | C00Q | C00T | C011 | 120.0(8)  |
| C009  | P006 | Cu04  | 117.4(3)  | C00V | C00U | C013 | 120.2(8)  |
| C009  | P006 | C00G  | 104.1(4)  | C00U | C00V | C00R | 120.1(9)  |
| C009  | P006 | C00K  | 105.9(4)  | C00N | C00W | C00A | 120.7(8)  |
| C00G  | P006 | Cu04  | 114.4(3)  | C00P | C00X | C00D | 119.6(9)  |
| C00K  | P006 | Cu04  | 109.3(3)  | C00K | C00Y | C010 | 121.2(10) |
| C00K  | P006 | C00G  | 104.6(4)  | C00G | C00Z | C013 | 121.5(9)  |
| C00B  | C007 | C00F  | 119.2(9)  | C012 | C010 | C00Y | 119.1(10) |
| C00I  | C008 | P005  | 119.1(6)  | C00T | C011 | C00O | 120.1(9)  |
| C00O  | C008 | P005  | 123.2(6)  | C010 | C012 | C016 | 121.0(10) |

\*3/2-X, 3/2-Y, 1-Z



## References of ESI

1. G. M. Sheldrick, *Acta Cryst. A*, 2008, **64**, 112-122.
2. G. Sheldrick, *Acta Cryst. C*, 2015, **71**, 3-8.
3. O. V. Dolomanov, L. J. Bourhis, R. J. Gildea, J. A. K. Howard and H. Puschmann, *J. Appl. Crystallogr.*, 2009, **42**, 339-341.
4. M. J. Frisch, G. W. Trucks, H. B. Schlegel, G. E. Scuseria, M. A. Robb, J. R. Cheeseman, G. Scalmani, V. Barone, G. A. Petersson, H. Nakatsuji, X. Li, M. Caricato, A. Marenich, J. Bloino, B. G. Janesko, R. Gomperts, B. Mennucci, H. P. Hratchian, J. V. Ortiz, A. F. Izmaylov, J. L. Sonnenberg, D. Williams-Young, F. Ding, F. Lipparini, F. Egidi, J. Goings, B. Peng, A. Petrone, T. Henderson, D. Ranasinghe, V. G. Zakrzewski, J. Gao, N. Rega, G. Zheng, W. Liang, M. Hada, M. Ehara, K. Toyota, R. Fukuda, J. Hasegawa, M. Ishida, T. Nakajima, Y. Honda, O. Kitao, H. Nakai, T. Vreven, K. Throssell, J. J. A. Montgomery, J. E. Peralta, F. Ogliaro, M. Bearpark, J. J. Heyd, E. Brothers, K. N. Kudin, V. N. Staroverov, T. Keith, R. Kobayashi, J. Normand, K. Raghavachari, A. Rendell, J. C. Burant, S. S. Iyengar, J. Tomasi, M. Cossi, J. M. Millam, M. Klene, C. Adamo, R. Cammi, J. W. Ochterski, R. L. Martin, K. Morokuma, O. Farkas, J. B. Foresman and D. J. Fox, Gaussian 09, Wallingford CT, Gaussian, Inc, 2016
5. T. Lu and F. Chen, *J. Comput. Chem.*, 2012, **33**, 580-592.
6. W. Humphrey, A. Dalke and K. Schulten, *J. Mol. Graph.*, 1996, **14**, 33-38.
7. S. Liu, X. Zeng and B. Xu, *Tetrahedron Lett.*, 2016, **57**, 3706-3710.
